# Supplementary material
Source: PubMed Central journal article supplement (PMC3869707)
Supplement: NIHMS524981-supplement-1.pdf [file NIHMS524981-supplement-1.pdf]

**HER3 (+ HRG)****High**

VIKRESGPGIAPGPEPHGL  
RSLKEISAGRIY  
HKIPALDPEKL  
LERGE<sub>5</sub>IEPLDPSEKANKVL  
LKSPSQVQVADF  
MIDENIRPTF  
MALESIHf

**Low**

NRGF  
KGT<sub>2</sub>SSREGTL  
GAEPY  
RGPT<sub>2</sub>EERL  
AHEAEcF  
QLEPNPHTKY  
GPGSEdcQTL  
IREVTGY  
GPGGQcL  
ARIF  
LNGEPREF  
VVIFmL  
QLVTQY  
GLcPGSSL  
RSLEAtDSAF  
MDVGSdL  
LERGE<sub>5</sub>IEPLDPSEKANKVL  
GQTLVLIGKTHL  
VLVAmNEF  
IGKTHL  
MIDENIRPTFKEL  
AQPQcTIDVY  
SYGVTVW  
MMLGGTF  
RLAEVPDLL  
RLTQLTEIL  
VLVAMNEF  
TVIAGLVVIFmL  
tVIAGLVVIFmML  
WRGRRIQNKRAMRRYL  
GSGVF  
TNKKL

**MTK1 (+ HRG)****High**

VKvcTDEE  
ISQSKDTASKL  
KWQRGNKIGEGQY  
VKNDRPVEF  
DIQSRDcISKKL  
KNNAQTmPGEVNSTL  
KVGMGHKPPPERL  
DHSFVKvcTDEE  
SRTPPSSEEkSAVSW  
NITKDLNQL  
IRGGEAQAGKLF  
KVDYGSF  
KNNAQTmPGEVNSTL  
VDKALKQMGL  
AAKDFQDRVQAL  
KNNAQTmPGEVNSTLGTAAAY  
FGVELHREEmY  
YREAMIQGY  
cQEQTSSQPVIKAL  
LNVIHEcL  
LNITKDLNQL  
FGVELHREEMY  
DNVMHVGL  
DAEVDSESVTL  
GLQEHVIRLY  
TASQLLDHSF  
cDEGTLEEVSRL  
VKVQIPGLENL  
IKLGDfGcSVKL  
GAPDWSTEAGF  
VPDTLAEKSIL  
TSSGLIKLGDf  
MEYcDEGTLEEVSRL  
GLQEScAEFW  
EQVKRIMLELY  
GPIEAIQKSVRLF  
VKVQIPGLENLQmF  
QMFVPDTLAEKSIL  
GIKNLSDIGWVPVf  
VKVQIPGLENLQMF  
TARQAIPDIINEIL

**Medium**

VVmQSAHL  
NVIHEcL  
NGTSVEGQcKATPGTKIVGY  
SPEGKDFL  
GLQEHVIRL  
RKDL<sub>2</sub>EIAAEF  
RSMQVDNLL  
SAPVRDLLDLV

**Low**

NKPY  
QQYy  
IDAyLL  
HEARERASKAL  
RQKIGDKY  
KQEKKIRAAL  
HREEMY  
RKVTF  
RTTERDHKKNVQcSF  
TKEITHY  
VRDRAGF  
HKEVVRL  
TKHGDRARDESDSW  
TIQRKAF  
SPEGKDF  
LMKQY  
LNRSNEL  
IRGGEAQAGKL  
QRGNKIGEGQY  
VREcKEVL  
EEVSRLGL  
HEYEHNF  
RSmQVDNL  
QDRVQAL  
ELRTL  
MKQYY  
KEK<sub>m</sub>NAPNQPHKDTGKTVENVEEY  
QQYY  
LTSSGL  
TSIY

**MTK1 (- HRG)****High**

EAQPVKVPQVETVDTL  
VPDTLAEKSIL  
cQEQTSSQPVIKAL  
VKVQIPGLENLQMF  
LNITKDLNQL

**Medium**

VKvcTDEE  
HAGRTINDQDFF

**Low**

RQKIGDKY  
RLEQRPAGEPSLL  
GAPDWSTEAGF  
KVDYGSF  
AFVRDRAGF  
NFGFEY  
GIKNLSDIGWVPVf  
QQYy  
EPAF  
QDRVQALcL  
YREAMIQGYNF  
QRGNKIGEGQY  
KIFEGIKHPNL  
SIKQLVRECKEVL  
SKQITAIINVL  
PSFEPAF  
LVcRVL  
LNVIHECL  
AKmL  
HKML  
CRVL

**Low**

GVELHREEmY  
KEKMNAPNQPHKDTGKTVENVEEY  
HAGRTINDQDFF  
RLEQRPAGEPSLL  
KVGmGHKPPPERL  
MSGEF  
KELF  
QPNDHKTIKETADEL  
KSTGSFL  
DNVmHVGL  
AFVRDRAGF  
RPFVDKAL  
EGIKHPNLVRY  
SRHcLTSIY  
QQLPQASHL  
Dy<sub>m</sub>RSW  
VVMQSAHL  
GVELHREEMY  
RSMQVDNL  
tSSGLIKLGDf  
YREAmIQGY  
REAMIQGY  
VLCRVL  
NFTKEITHY  
TASQLL  
KNDALEL  
FETL  
AEEKSIL  
QQSIEGL  
RSmQVDNLL  
WLNRSNEL  
EQRPAGEPSLL  
IFmEY  
RIMGTVL  
GLQEScAEF  
DYMRSW  
ARKWMNY  
QQLKNDALEL  
HAGRTINDQDFF  
EIAAEF  
NAAAGKDCSKDSDDVLIDAY  
ASIAAEL  
RLSAPVRDLL  
KNNAQTmPGEVNSTLGTAAAY  
VLCRVL  
MNEcIGHVIGKPHSPVTGLY  
IKLGDf  
KFFETL  
TcISVDGTGEL  
RSmQVDNLLL  
LNRSNELIW  
EAQPVKVPQVETVDTL  
KNLLEEEW  
cDIAGmLL  
KSTGSFLEF  
RSMQVDNLLL  
NFGFEY  
LNITKDL  
QMFVPDTL  
QmFVPDTLAEKSIL  
cDIAGMML  
SEFPDPMWGSDY  
IWLEL  
NQKL<sub>2</sub>RIMGTVLGIKNL  
TSADDSSASDEIRRSVIEISRAL  
SDIGWVPVf  
FcDIAGMML  
KSKQYVKVQIPGLENL  
TSEF  
G<sub>s</sub>FAF  
SHCL  
CDIAGmLL  
RKLIL
